# Supplementary material for: Structure control and crystal-to-crystal transformation for two series of lanthanide–organic coordination polymers
Source: Royal Society of Chemistry journal article supplement (doi:10.1039/c3ce41207e), 2013-01-01
Supplement: c3ce41207e.pdf [file c3ce41207e.pdf]

SUPPORTING INFORMATION

Structure Control and Crystal-to-Crystal Transformation for Two Series  
of Lanthanide-Organic Coordination Polymers

Yanfei Gao,<sup>a</sup> Jianwei Cao,<sup>a</sup> Ye Song,<sup>a</sup> Guonan Zhang,<sup>a</sup> Yanqin Wang,<sup>a</sup> Zhiliang Liu<sup>a,b\*</sup>

<sup>a</sup> College of Chemistry and Chemical Engineering, Inner Mongolia University; <sup>b</sup> Inner Mongolia

Key Lab of Nanoscience and Nanotechnology, Hohhot, 010021, P. R. China

|                                                                                                            |   |
|------------------------------------------------------------------------------------------------------------|---|
| S1. Detail experiment for certificating the role of 2,2'-bipyridine .....                                  | 2 |
| Figure S1 Morphology of crystal-to-crystal transformation .....                                            | 2 |
| Figure S2 IR spectra of <i>Series a</i> and <i>Series b</i> .....                                          | 3 |
| Figure S3 Solid-state excitation spectrum of H <sub>2</sub> CPOB (left) and Samples (right) .....          | 3 |
| Table S1. Average bond length of Ln-O for <b>a2-a6</b> and <b>b1-b6</b> .....                              | 3 |
| Table S2 Selected bond lengths(Å) and angles(°) for compounds in Series <b>a</b> and Series <b>b</b> ..... | 4 |

### S1. Detail experiment for certificating the role of 2,2'-bipyridine

A mixture of H<sub>2</sub>CPOB (0.0775g, 0.2mmol), 0.2mmol of Ln(NO<sub>3</sub>)<sub>3</sub>·6H<sub>2</sub>O [Ln=Eu (0.0892 d); Gd (0.0902 g); Tb (0.0906 g); Dy (0.0913 g); Ho (0.916 g); Er ( 0.0887g)], and 8 mL of distilled water were sealed in a Teflon-lined stainless vessel (25 mL) then added 5-10 drops of ammonia (0.1M) and heated at 130 °C or 180 °C for 72 h under autogenous pressure. The vessel was then cooled slowly down to room temperature at 2 °C/h. Block crystals were obtained and the PXRD patterns indicate that these crystals have same structure as they were synthesized using 2,2'-bipyridine.

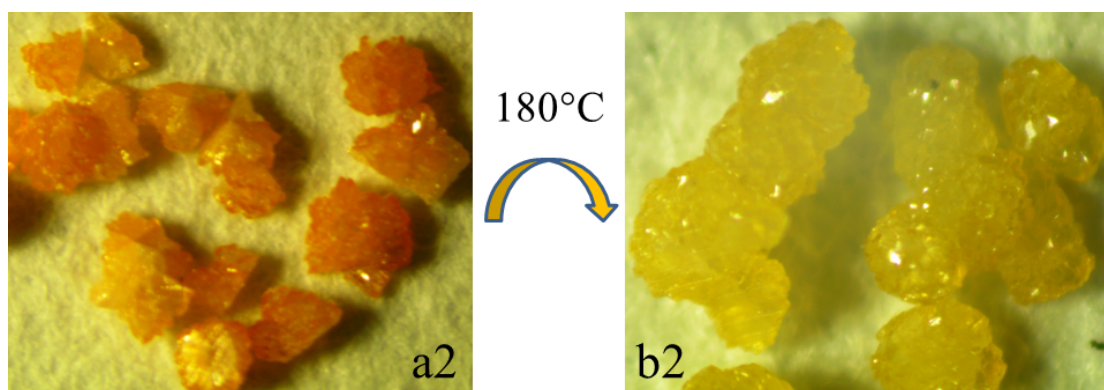

Figure S1 Morphology of crystal-to-crystal transformation

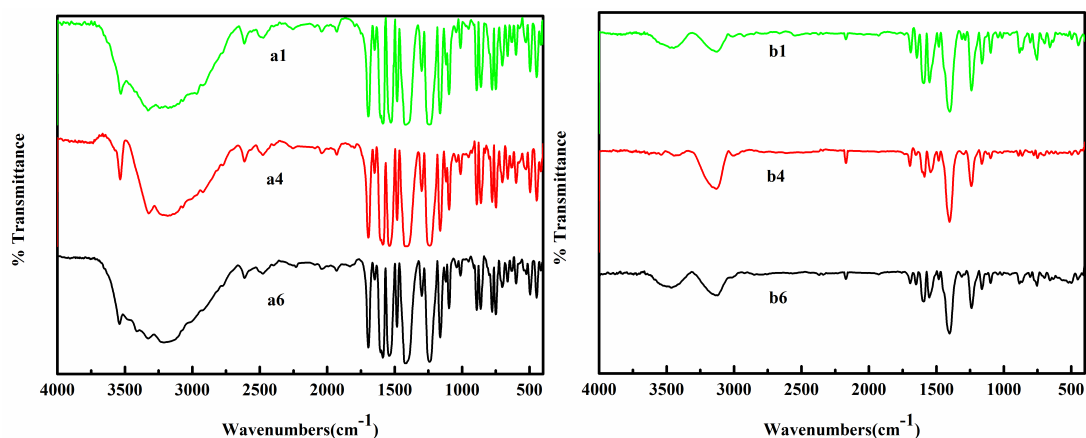

Figure S2. IR spectra of *Series a* and *Series b*

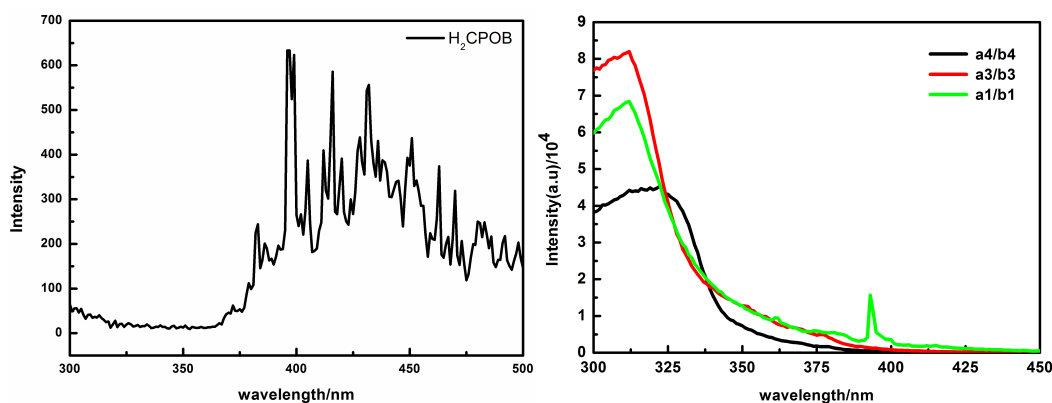

Figure S3. Solid-state excitation spectrum of H<sub>2</sub>CPOB (left) and Samples (right)

Table S1. Average bond length of Ln-O for **a2-a6** and **b1-b6**

| Compounds | bond length/(Å) | Compounds | bond length(Å) |
|-----------|-----------------|-----------|----------------|
| <b>a2</b> | 2.417           | <b>b1</b> | 2.354          |
| <b>a3</b> | 2.400           | <b>b2</b> | 2.348          |
| <b>a4</b> | 2.403           | <b>b3</b> | 2.330          |
| <b>a5</b> | 2.375           | <b>b4</b> | 2.312          |
| <b>a6</b> | 2.365           | <b>b5</b> | 2.302          |
|           |                 | <b>b6</b> | 2.289          |

Table S2 Selected bond lengths(Å) and angles(°) for compounds in Series **a** and Series **b**

| <b>a2</b>  |            |             |            |
|------------|------------|-------------|------------|
| Gd1-O1     | 2.519(4)   | Gd1-O9      | 2.409(4)   |
| Gd1-O2     | 2.396(4)   | Gd1-O10     | 2.487(4)   |
| Gd1-O6     | 2.332(4)   | Gd1-O11     | 2.419(4)   |
| Gd1-O7     | 2.342(4)   | Gd1-O12     | 2.431(4)   |
| O6-Gd1-O7  | 115.00(17) | O9-Gd1-O12  | 75.72(14)  |
| O6-Gd1-O2  | 95.49(16)  | O6-Gd1-O10  | 76.92(14)  |
| O6-Gd1-O9  | 79.74(15)  | O7-Gd1-O10  | 92.75(15)  |
| O2-Gd1-O9  | 71.80(15)  | O2-Gd1-O10  | 124.80(14) |
| O6-Gd1-O11 | 71.96(14)  | O9-Gd1-O10  | 53.01(14)  |
| O7-Gd1-O11 | 79.53(15)  | O12-Gd1-O10 | 76.30(14)  |
| O2-Gd1-O11 | 82.14(15)  | O6-Gd1-O1   | 131.62(15) |
| O6-Gd1-O12 | 151.16(14) | O7-Gd1-O1   | 84.25(16)  |
| O7-Gd1-O12 | 76.86(15)  | O2-Gd1-O1   | 52.67(13)  |
| O2-Gd1-O12 | 91.08(15)  | O9-Gd1-O1   | 114.31(15) |
| O6-Gd1-O7  | 115.00(17) | O11-Gd1-O1  | 68.64(15)  |
| O10-Gd1-O1 | 149.51(14) | O12-Gd1-O1  | 73.47(14)  |
| O6-Gd1-O6  | 67.90(15)  | O11-Gd1-O6  | 76.17(13)  |
| O7-Gd1-O6  | 48.82(15)  | O12-Gd1-O6  | 112.00(13) |
| O9-Gd1-O6  | 119.44(14) | O10-Gd1-O6  | 70.15(13)  |
| <b>a3</b>  |            |             |            |
| Tb1-O1     | 2.418(5)   | Tb1-O5      | 2.503(5)   |
| Tb1-O2     | 2.404(5)   | Tb1-O6      | 2.377(5)   |
| Tb1-O3     | 2.313(5)   | Tb1-O7      | 2.399(5)   |
| Tb1-O4     | 2.317(5)   | Tb1-O8      | 2.466(5)   |
| O6-Tb1-O8  | 125.25(16) | O6-Tb1-O2   | 83.05(18)  |
| O7-Tb1-O8  | 53.25(16)  | O4-Tb1-O1   | 77.29(17)  |
| O1-Tb1-O8  | 76.36(16)  | O6-Tb1-O1   | 91.51(19)  |
| O4-Tb1-O5  | 85.78(17)  | O7-Tb1-O1   | 75.41(17)  |
| O6-Tb1-O5  | 52.73(16)  | O3-Tb1-O8   | 76.87(18)  |
| O7-Tb1-O5  | 114.62(15) | O4-Tb1-O8   | 91.21(18)  |
| O2-Tb1-O5  | 68.68(15)  | O6-Tb1-O7   | 71.99(17)  |
| O1-Tb1-O5  | 74.24(17)  | O3-Tb1-O2   | 71.77(17)  |
| O3-Tb1-O4  | 113.95(17) | O4-Tb1-O2   | 79.08(19)  |
| O3-Tb1-O6  | 95.15(19)  | O3-Tb1-O7   | 80.01(17)  |

---

| <b>a4</b>  |            |            |            |
|------------|------------|------------|------------|
| Dy1-O1     | 2.421(5)   | Dy1-O5     | 2.487(6)   |
| Dy1-O2     | 2.404(5)   | Dy1-O6     | 2.392(5)   |
| Dy1-O3     | 2.382(5)   | Dy1-O7     | 2.318(5)   |
| Dy1-O4     | 2.497(5)   | Dy1-O12    | 2.324(5)   |
| O7-Dy1-O12 | 114.06(18) | O1-Dy1-O5  | 75.47(17)  |
| O7-Dy1-O3  | 95.25(18)  | O12-Dy1-O4 | 85.37(18)  |
| O7-Dy1-O6  | 79.56(17)  | O3-Dy1-O4  | 52.83(16)  |
| O3-Dy1-O6  | 72.21(19)  | O6-Dy1-O4  | 114.75(16) |
| O7-Dy1-O2  | 72.37(18)  | O2-Dy1-O4  | 68.58(17)  |
| O12-Dy1-O2 | 78.97(19)  | O1-Dy1-O4  | 74.72(18)  |
| O3-Dy1-O2  | 82.59(19)  | O7-Dy1-O5  | 76.61(18)  |
| O12-Dy1-O1 | 77.74(17)  | O12-Dy1-O5 | 91.43(19)  |
| O3-Dy1-O1  | 91.83(17)  | O3-Dy1-O5  | 125.42(18) |
| O6-Dy1-O1  | 74.86(17)  | O6-Dy1-O5  | 53.21(16)  |

---

---

| <b>a5</b>   |            |            |            |
|-------------|------------|------------|------------|
| Ho1-O1      | 2.361(3)   | Ho1-O9     | 2.368(3)   |
| Ho1-O2      | 2.487(3)   | Ho1-O10    | 2.445(4)   |
| Ho1-O6      | 2.271(4)   | Ho1-O11    | 2.379(3)   |
| Ho1-O7      | 2.300(3)   | Ho1-O12    | 2.387(3)   |
| O12-Ho1-O10 | 77.33(11)  | O7-Ho1-O12 | 77.87(12)  |
| O6-Ho1-O2   | 130.61(13) | O1-Ho1-O12 | 92.36(13)  |
| O7-Ho1-O2   | 87.75(12)  | O9-Ho1-O12 | 76.07(12)  |
| O1-Ho1-O2   | 53.48(11)  | O6-Ho1-O10 | 76.82(13)  |
| O9-Ho1-O2   | 115.37(11) | O7-Ho1-O10 | 88.48(12)  |
| O11-Ho1-O2  | 68.98(11)  | O1-Ho1-O10 | 126.42(11) |
| O12-Ho1-O2  | 73.91(12)  | O9-Ho1-O10 | 53.99(11)  |
| O6-Ho1-O7   | 112.56(13) | O1-Ho1-O9  | 72.45(12)  |
| O6-Ho1-O1   | 93.84(14)  | O6-Ho1-O11 | 71.67(12)  |
| O6-Ho1-O9   | 79.61(12)  | O7-Ho1-O11 | 78.77(13)  |
| O1-Ho1-O11  | 83.48(12)  |            |            |

---

---

| <b>a6</b>  |            |            |           |
|------------|------------|------------|-----------|
| Er1-O1     | 2.380(6)   | Er1-O5     | 2.472(5)  |
| Er1-O2     | 2.378(6)   | Er1-O6     | 2.339(5)  |
| Er1-O3     | 2.263(6)   | Er1-O9     | 2.439(5)  |
| Er1-O4     | 2.288(5)   | Er1-O10    | 2.365(5)  |
| O6-Er1-O2  | 93.6(2)    | O1-Er1-O5  | 68.95(19) |
| O6-Er1-O5  | 54.03(17)  | O4-Er1-O2  | 78.3(2)   |
| O6-Er1-O9  | 126.66(18) | O4-Er1-O5  | 89.28(18) |
| O6-Er1-O10 | 72.66(19)  | O4-Er1-O9  | 86.93(19) |
| O10-Er1-O2 | 75.85(19)  | O4-Er1-O10 | 136.9(2)  |

---

---

|            |            |            |          |
|------------|------------|------------|----------|
| O10-Er1-O5 | 115.74(18) | O6-Er1-O1  | 83.6(2)  |
| O10-Er1-O9 | 54.06(17)  | O3-Er1-O5  | 130.4(2) |
| O2-Er1-O5  | 74.66(19)  | O3-Er1-O6  | 92.9(2)  |
| O2-Er1-O9  | 77.07(19)  | O3-Er1-O9  | 76.6(2)  |
| O3-Er1-O1  | 71.8(2)    | O3-Er1-O10 | 79.5(2)  |
| O3-Er1-O4  | 111.6(2)   | O4-Er1-O1  | 78.7(2)  |

---

---

**b1**

---

|            |            |            |            |
|------------|------------|------------|------------|
| Eu1-O1     | 2.485(4)   | Eu1-O7     | 2.303(4)   |
| Eu1-O4     | 2.331(4)   | Eu1-O9     | 2.365(4)   |
| Eu1-O5     | 2.252(4)   | Eu1-O10    | 2.397(4)   |
| Eu1-O6     | 2.346(4)   |            |            |
| O6-Eu1-O9  | 75.41(14)  | O5-Eu1-O6  | 96.70(14)  |
| O6-Eu1-O9  | 72.91(13)  | O5-Eu1-O7  | 112.65(15) |
| O6-Eu1-O10 | 82.09(14)  | O5-Eu1-O9  | 82.26(13)  |
| O7-Eu1-O4  | 73.78(14)  | O5-Eu1-O9  | 161.05(12) |
| O7-Eu1-O6  | 131.92(13) |            |            |
| O7-Eu1-O9  | 67.27(14)  | O6-Eu1-O1  | 75.04(13)  |
| O7-Eu1-O9  | 72.08(15)  | O1-Eu1-O9  | 114.70(12) |
| O7-Eu1-O10 | 89.56(16)  | O4 Eu1 O1  | 74.86(14)  |
| O9-Eu1-O1  | 140.87(14) | O4-Eu1-O9  | 136.53(15) |
| O9-Eu1-O9  | 79.81(14)  | O4-Eu1-O9  | 110.47(12) |
| O9-Eu1-O10 | 126.34(14) | O4-Eu1-O10 | 78.96(14)  |
| O10-Eu1-O1 | 73.62(14)  | O5-Eu1-O1  | 76.34(14)  |
| O10-Eu1-O9 | 46.92(12)  | O5-Eu1-O4  | 86.86(13)  |

---

---

**b2**

---

|            |          |            |          |
|------------|----------|------------|----------|
| Gd1-O1     | 2.260(8) | Gd1-O7     | 2.395(7) |
| Gd1-O2     | 2.309(8) | Gd1-O9     | 2.340(8) |
| Gd1-O5     | 2.481(8) | Gd1-O10    | 2.289(9) |
| Gd1-O6     | 2.361(8) |            |          |
| O1-Gd1-O10 | 113.3(3) | O1-Gd1-O5  | 76.2(3)  |
| O1-Gd1-O2  | 86.4(3)  | O7-Gd1-O5  | 74.2(3)  |
| O10-Gd1-O2 | 74.1(3)  | O2-Gd1-O5  | 74.6(3)  |
| O1-Gd1-O9  | 97.3(3)  | O9-Gd1-O5  | 75.3(3)  |
| O10-Gd1-O9 | 131.3(3) | O10-Gd1-O7 | 88.5(3)  |
| O1-Gd1-O6  | 81.7(3)  | O2-Gd1-O7  | 79.5(3)  |
| O10-Gd1-O6 | 72.3(3)  | O9-Gd1-O7  | 81.6(3)  |
| O2-Gd1-O6  | 136.0(3) | O9-Gd-O6   | 76.0(3)  |

---

---

**b3**

---

|        |          |        |          |
|--------|----------|--------|----------|
| Tb1-O1 | 2.456(8) | Tb1-O7 | 2.365(8) |
| Tb1-O4 | 2.318(7) | Tb1-O9 | 2.321(7) |

---

---

|            |          |            |          |
|------------|----------|------------|----------|
| Tb1-O5     | 2.231(7) | Tb1-O10    | 2.281(8) |
| Tb1-O6     | 2.329(8) |            |          |
| O4-Tb1-O1  | 75.4(3)  | O9-Tb1-O6  | 75.6(3)  |
| O4-Tb1-O7  | 80.1(3)  | O9-Tb1-O7  | 81.3(3)  |
| O5-Tb1-O1  | 76.6(3)  | O10-Tb1-O4 | 73.7(3)  |
| O5-Tb1-O4  | 86.7(3)  | O10-Tb1-O6 | 72.6(3)  |
| O5-Tb1-O6  | 81.3(3)  | O10-Tb1-O7 | 87.6(3)  |
| O5-Tb1-O9  | 97.6(3)  | O6-Tb1-O7  | 125.7(3) |
| O5-Tb1-O10 | 113.6(3) | O7-Tb1-O1  | 75.0(3)  |
| O9-Tb1-O1  | 75.3(3)  |            |          |

---

**b4**

---

|            |          |            |          |
|------------|----------|------------|----------|
| Dy1-O1     | 2.426(8) | Dy1-O7     | 2.289(8) |
| Dy1-O4     | 2.311(7) | Dy1-O9     | 2.343(9) |
| Dy1-O5     | 2.199(8) | Dy1-O10    | 2.335(9) |
| Dy1-O6     | 2.280(8) |            |          |
| O5-Dy1-O6  | 112.9(3) | O10-Dy1-O9 | 125.9(3) |
| O5-Dy1-O7  | 99.6(3)  | O5-Dy1-O1  | 76.2(3)  |
| O5-Dy1-O4  | 87.0(3)  | O7-Dy1-O1  | 75.8(3)  |
| O6-Dy1-O4  | 73.8(3)  | O4-Dy1-O1  | 74.6(3)  |
| O7-Dy1-O4  | 147.1(3) | O10-Dy1-O9 | 125.9(3) |
| O5-Dy1-O10 | 82.0(3)  | O5-Dy1-O1  | 76.2(3)  |
| O6-Dy1-O10 | 72.3(3)  | O6-Dy1-O9  | 87.9(3)  |
| O7-Dy1-O10 | 76.2(3)  | O7-Dy1-O9  | 80.3(3)  |
| O4-Dy1-O10 | 136.7(3) | O4-Dy1-O9  | 78.4(3)  |

---

**b5**

---

|            |            |            |          |
|------------|------------|------------|----------|
| Ho1-O1     | 2.420(6)   | Ho1-O7     | 2.304(6) |
| Ho1-O4     | 2.289(5)   | Ho1-O9     | 2.293(6) |
| Ho1-O5     | 2.216(5)   | Ho1-O10    | 2.258(6) |
| Ho1-O6     | 2.333(6)   |            |          |
| O5-Ho1-O10 | 113.7(2)   | O5-Ho1-O1  | 77.0(2)  |
| O5-Ho1-O4  | 86.91(18)  | O4-Ho1-O1  | 75.3(2)  |
| O10-Ho1-O4 | 74.0(2)    | O9-Ho1-O1  | 75.3(2)  |
| O5-Ho1-O9  | 98.61(19)  | O6-Ho1-O1  | 75.5(2)  |
| O10-Ho1-O9 | 129.90(19) | O10-Ho1-O6 | 86.6(2)  |
| O4-Ho1-O9  | 147.9(2)   | O4-Ho1-O6  | 79.7(2)  |
| O5-Ho1-O7  | 80.6(2)    | O9-Ho1-O6  | 80.8(2)  |
| O10-Ho1-O7 | 72.4(2)    | O9-Ho1-O7  | 76.6(2)  |

---

**b6**

---

|        |          |        |          |
|--------|----------|--------|----------|
| Er1-O1 | 2.199(4) | Er1-O7 | 2.327(5) |
| Er1-O2 | 2.281(4) | Er1-O9 | 2.284(4) |

---

---

|            |            |            |            |
|------------|------------|------------|------------|
| Er1-O5     | 2.414(5)   | Er1-O10    | 2.237(4)   |
| Er1-O6     | 2.282(5)   |            |            |
| O1-Er1-O2  | 86.57(15)  | O9-Er1-O5  | 75.09(16)  |
| O1-Er1-O5  | 76.97(18)  | O9-Er1-O7  | 80.95(17)  |
| O1-Er1-O6  | 80.37(17)  | O10-Er1-O2 | 74.08(16)  |
| O1-Er1-O9  | 98.75(16)  | O10-Er1-O6 | 73.35(19)  |
| O1-Er1-O10 | 114.37(19) | O10-Er1-O7 | 85.49(19)  |
| O2-Er1-O5  | 75.38(17)  | O10-Er1-O9 | 129.59(15) |
| O2-Er1-O6  | 135.67(19) | O6-Er1-O7  | 125.98(16) |
| O2-Er1-O7  | 79.93(17)  | O6-Er1-O9  | 76.28(18)  |
| O7-Er1-O5  | 75.87(16)  |            |            |

---
